# Supplementary material
Source: MDPI journal article supplement (https://www.mdpi.com/2079-6412/13/12/2084)
Supplement: s1 [file s1]

# Tailoring Mechanical Properties of a-C:H:Cr Coatings

Alireza Bagherpour <sup>1</sup>, Paul Baral <sup>2,3</sup>, Marie-Stéphane Colla <sup>2</sup>, Andrey Orekhov <sup>2,4</sup>, Hosni Idrissi <sup>2,4</sup>, Emile Haye <sup>1,\*</sup>, Thomas Pardoën <sup>2,5</sup> and Stéphane Lucas <sup>1</sup>

<sup>1</sup> Laboratoire d'Analyse par Réaction Nucléaires (LARN), Namur Institute of Structured Matter (NISM), University of Namur, 61 Rue de Bruxelles, 5000 Namur, Belgium; alireza.bagherpour@unamur.be (A.B.); stephane.lucas@unamur.be (S.L.)

<sup>2</sup> Institute of Mechanics, Materials and Civil Engineering (iMMC), Université catholique de Louvain, av G Lemaître 4, 1348 Louvain-la-Neuve, Belgium; marie-stephane.colla@uclouvain.be (M.-S.C.); andrey.orekhov@uantwerpen.be (A.O.); hosni.idrissi@uclouvain.be (H.I.); thomas.pardoën@uclouvain.be (T.P.)

<sup>3</sup> Univ. Lyon, Mines Saint Etienne, CNRS UMR 5307 LGE, Centre SMS, 42100 Saint Etienne, France

<sup>4</sup> Electron Microscopy for Materials Science (EMAT), University of Antwerp, Groenenborgerlaan 171, 2020 Antwerp, Belgium

<sup>5</sup> WEL Research Institute, Avenue Pasteur, 6, 1300 Wavre, Belgium

\* Correspondence: emile.haye@unamur.be

**Additional information regarding experiments:**

*XPS spectra:*

XPS depth profiling maps illustrate for a-C:H:Cr coatings show the presence of each element versus the etching time. The color reveals the intensity of the signal (yellow = high number of counts). One can see that a higher amount of oxygen is obvious in floating mode.

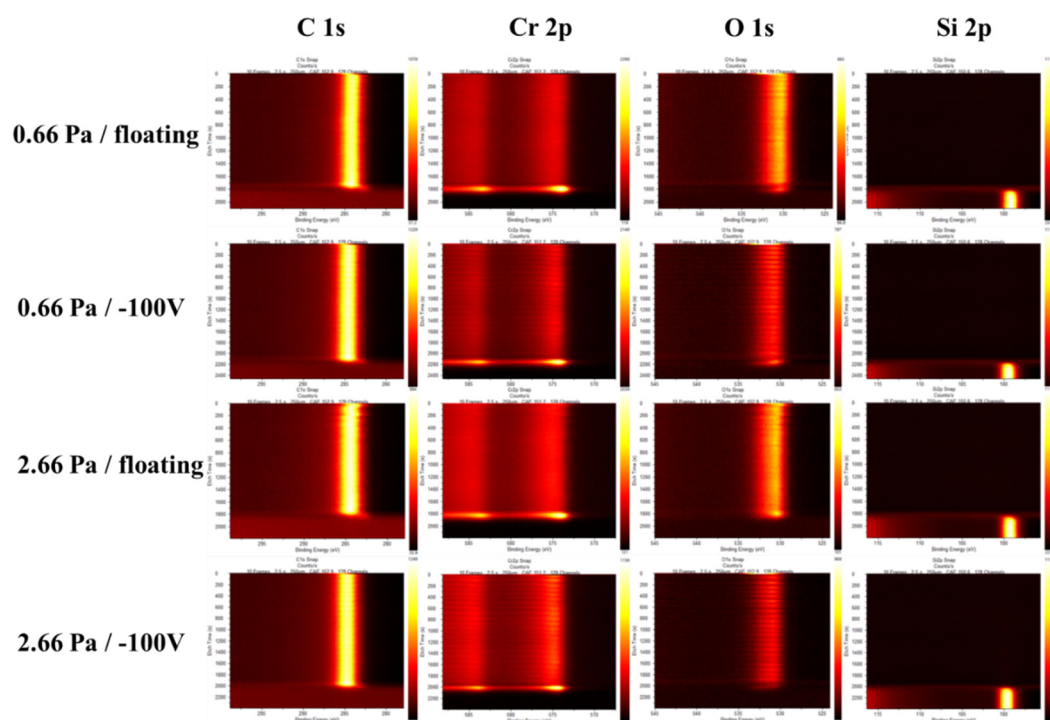

Figure S 1. XPS depth profiling maps illustrate for a-C:H:Cr coatings show the presence of each element versus the etching time.
